# Supplementary material
Source: publisher figshare collection journal article supplement (https://karger.figshare.com/ndownloader/files/28840038)

**Supplemental file 5. CHARMS risk of bias assessment by domains**


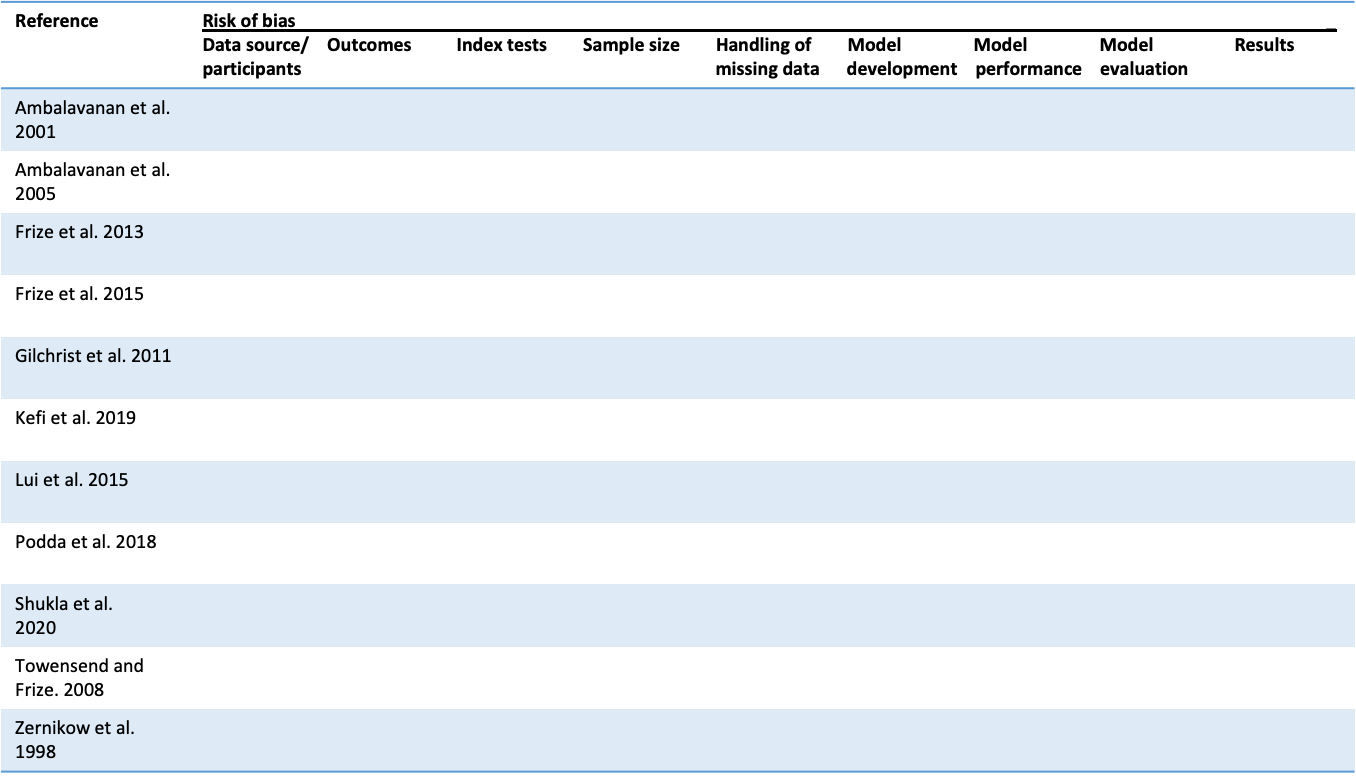


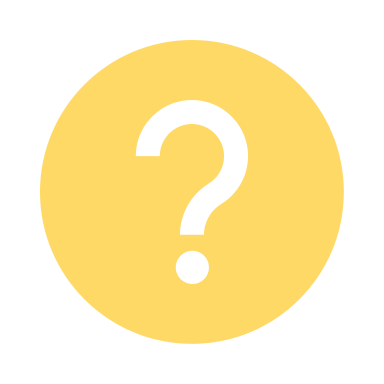

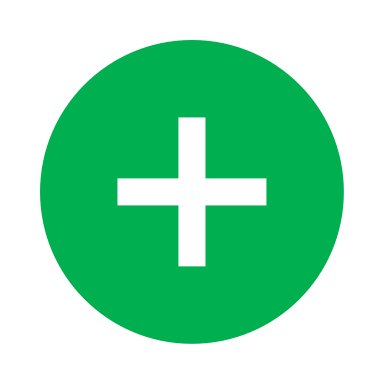

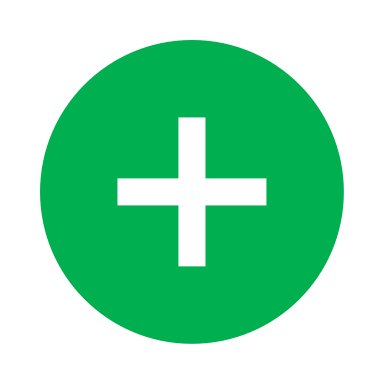

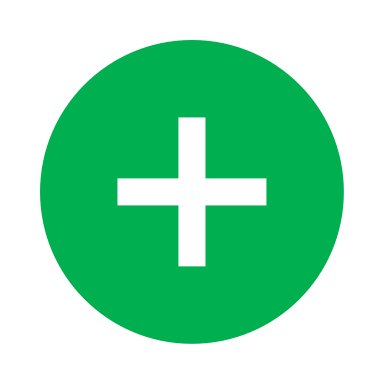

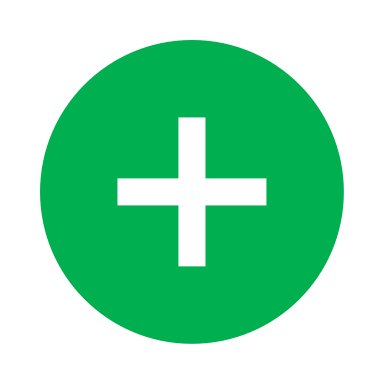

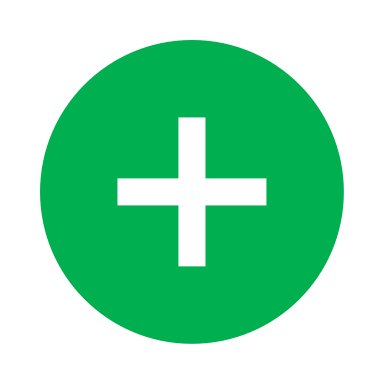

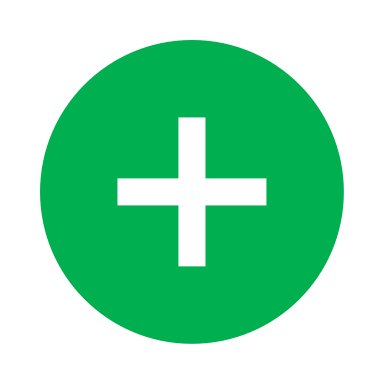

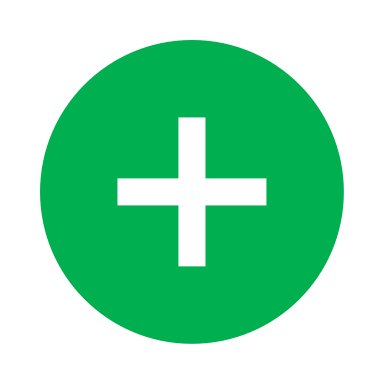

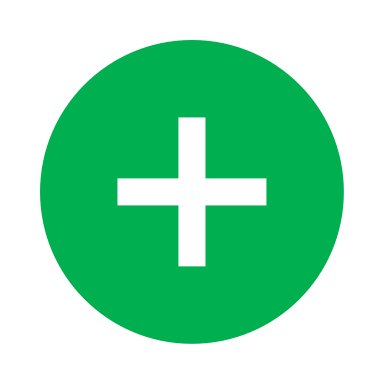

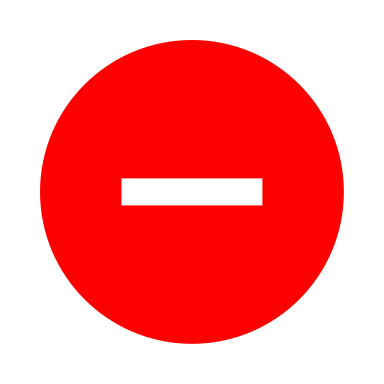

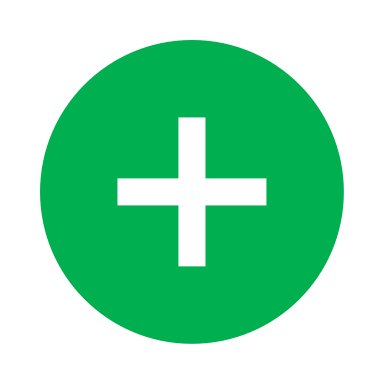

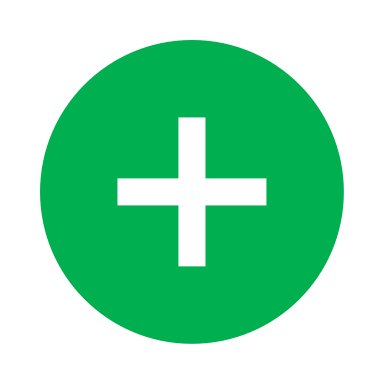

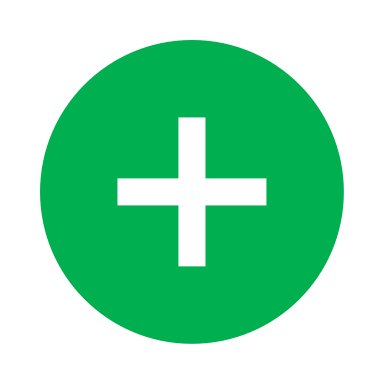

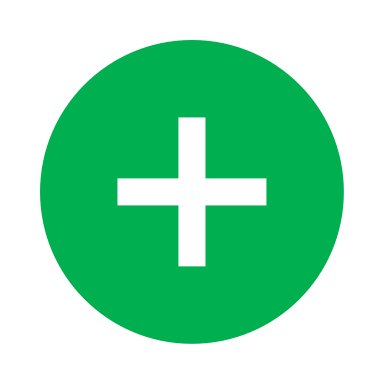

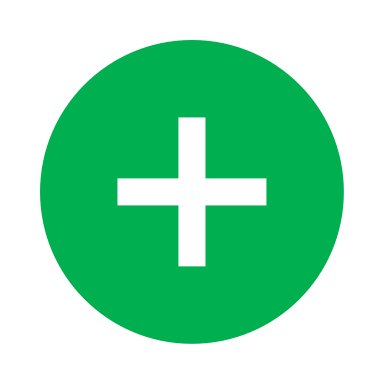

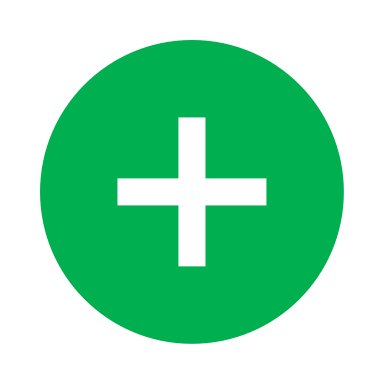

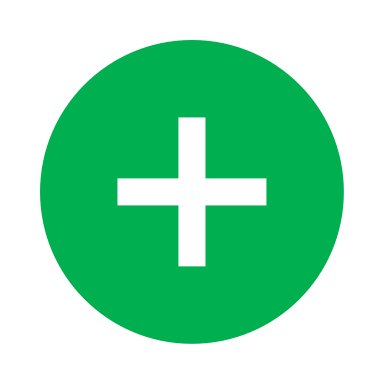

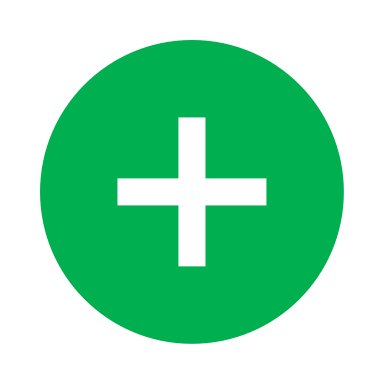

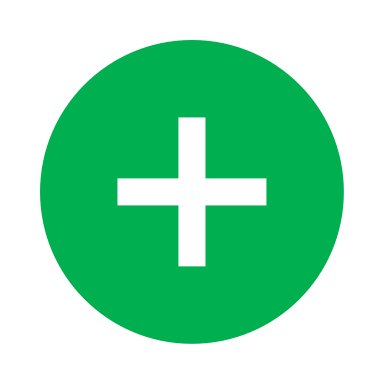

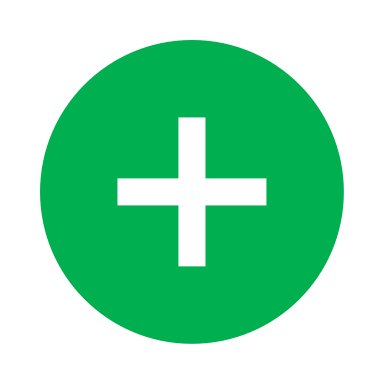

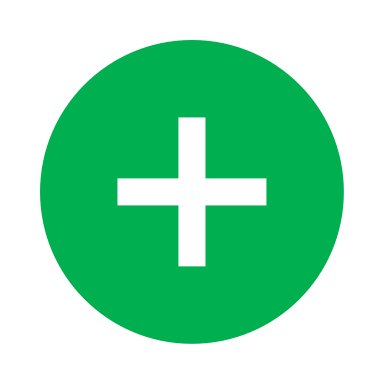

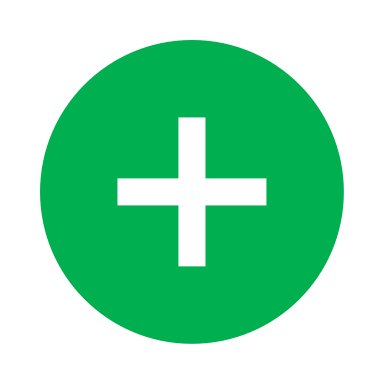

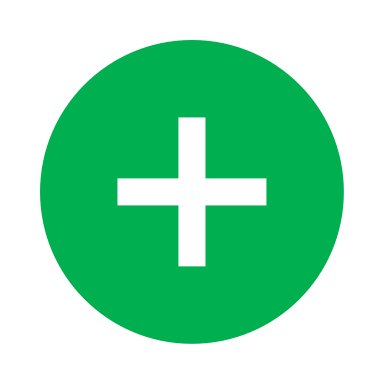

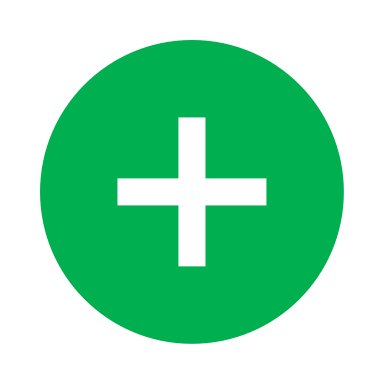

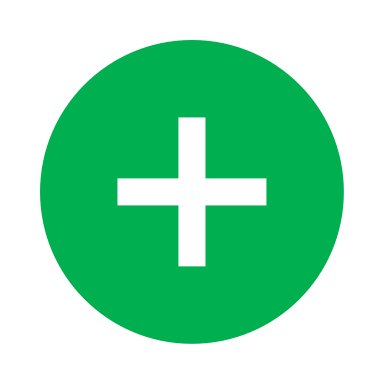

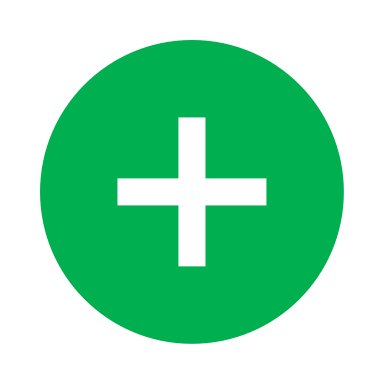

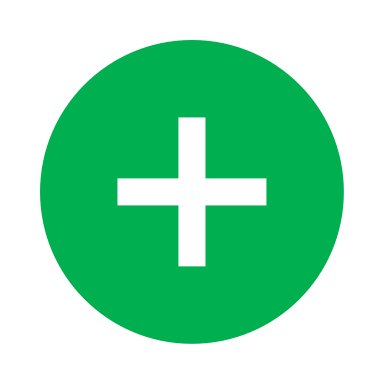

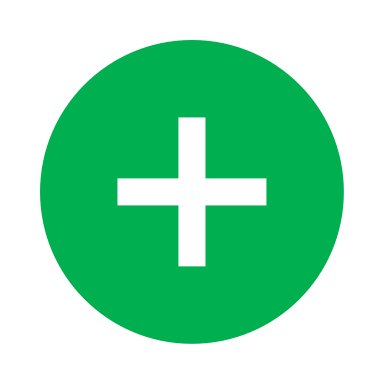

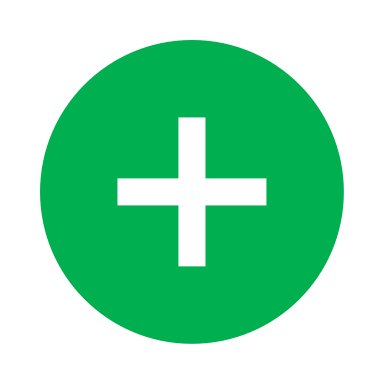

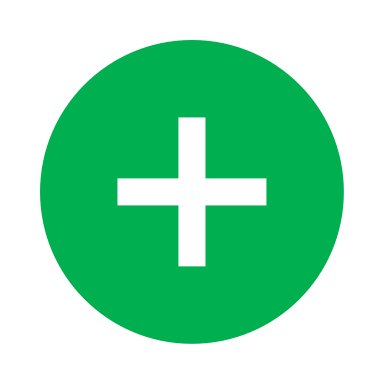

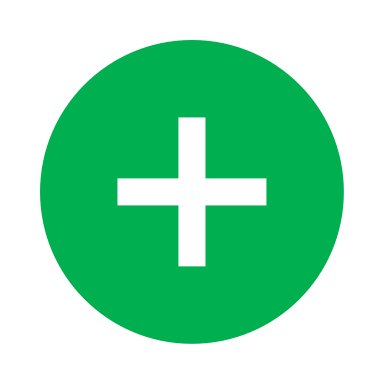

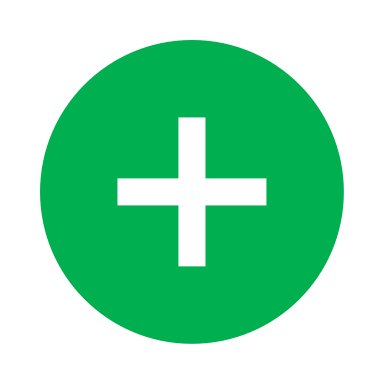

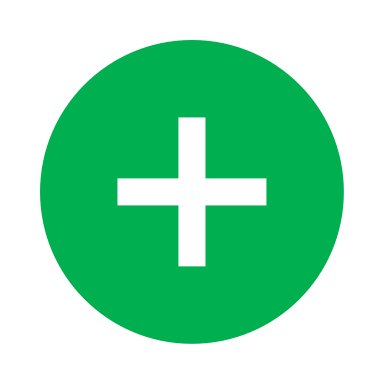

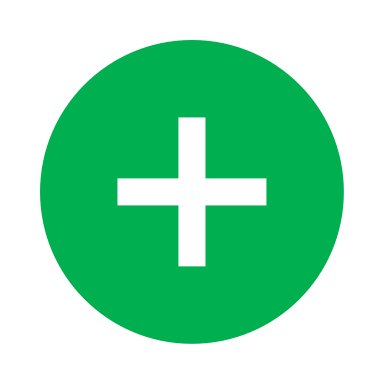

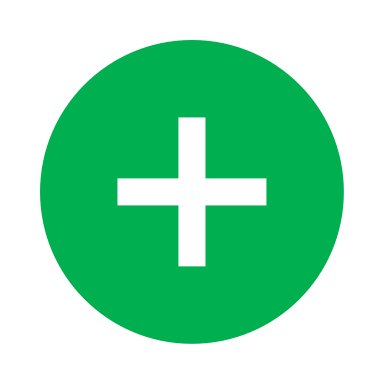

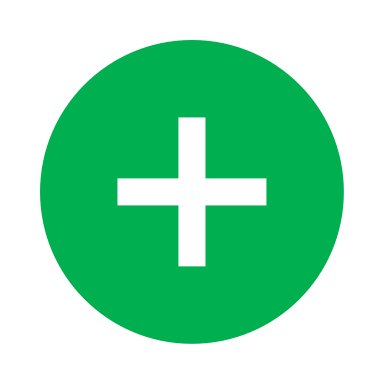

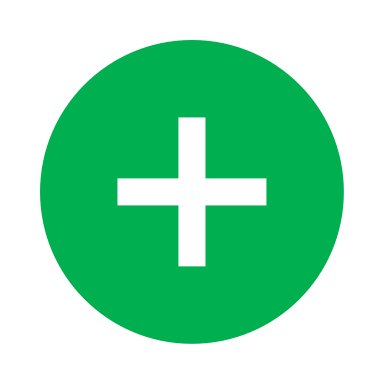

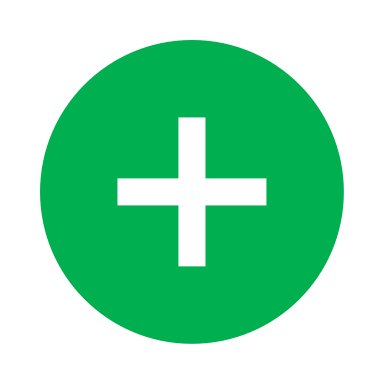

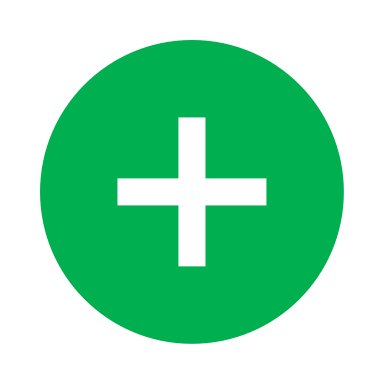

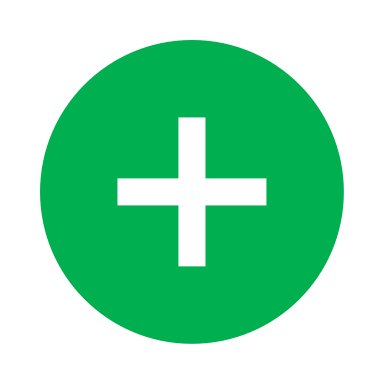

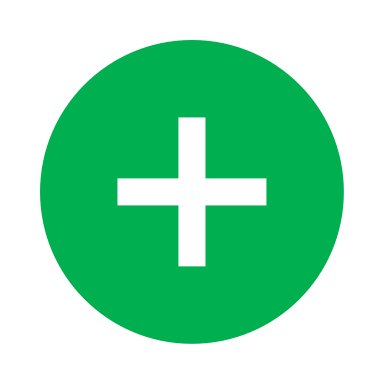

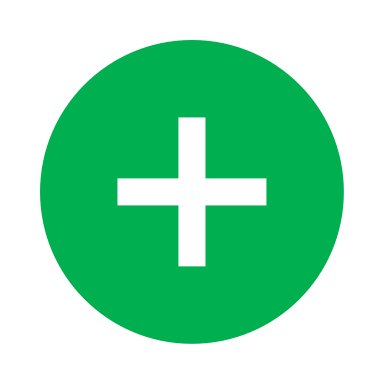

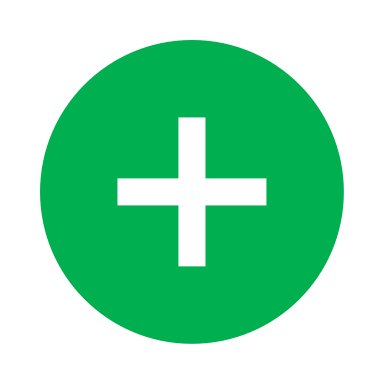

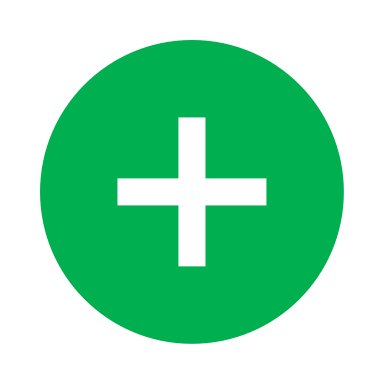

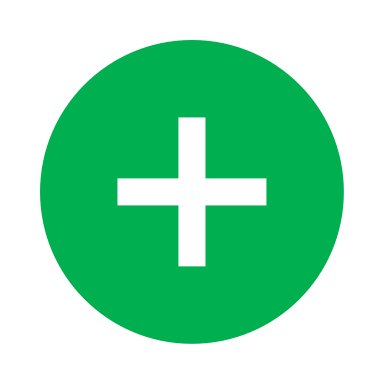

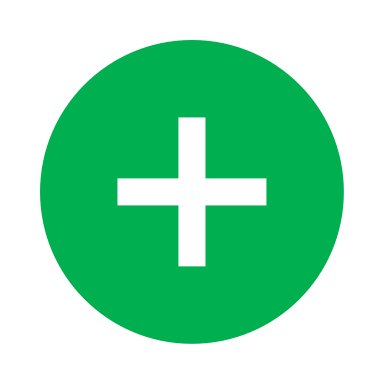

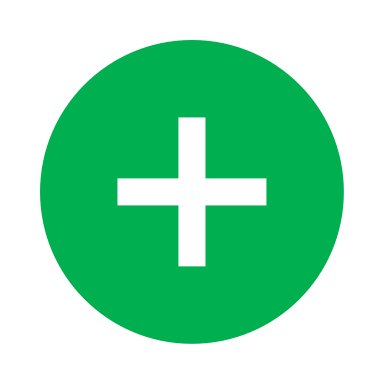

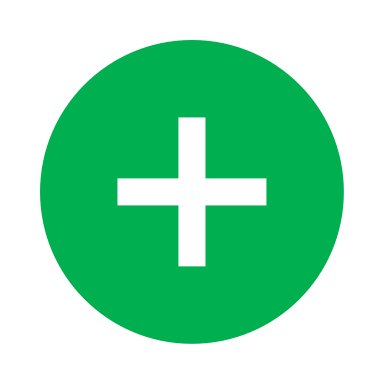

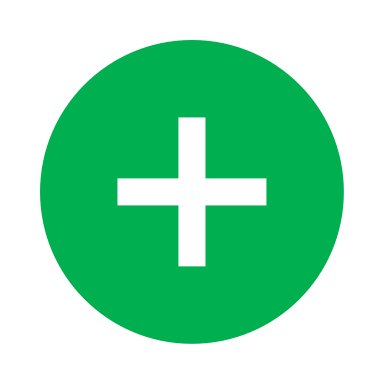

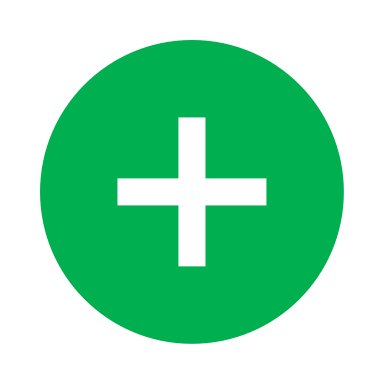

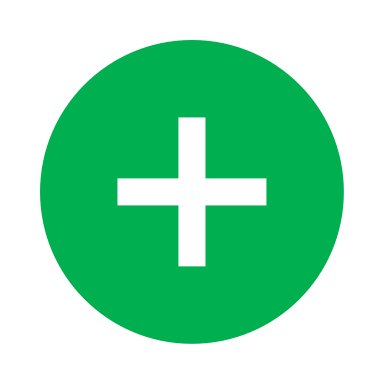

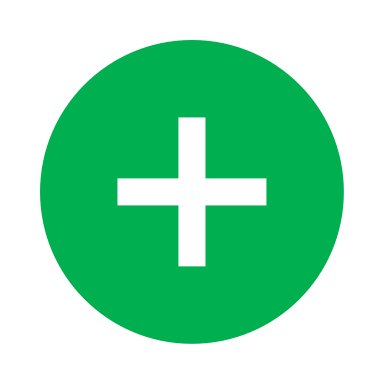

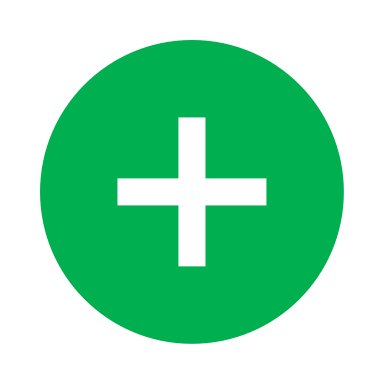

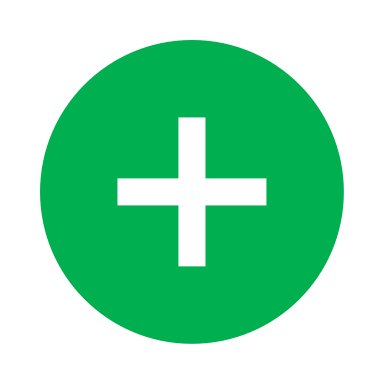

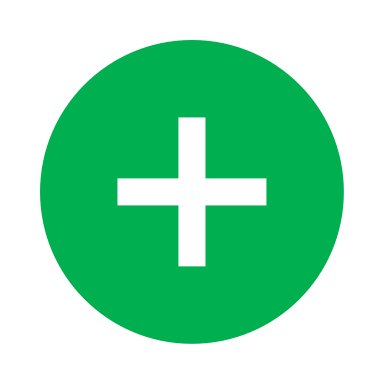

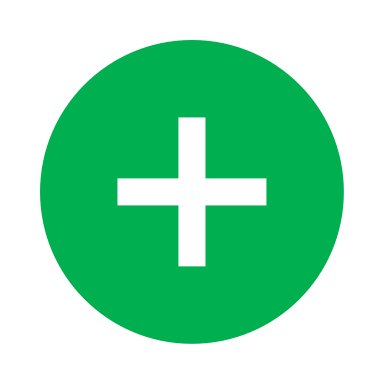

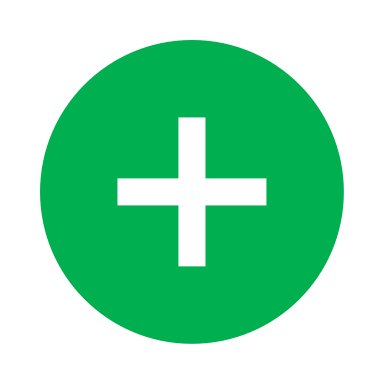

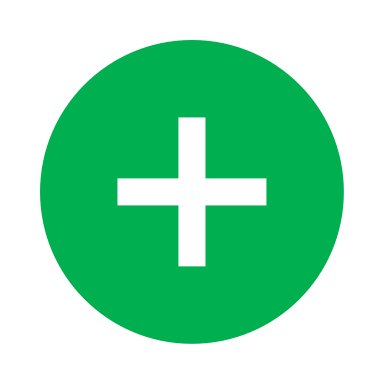

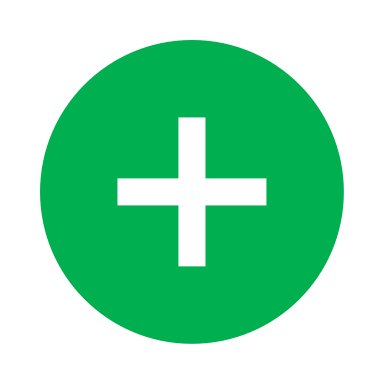

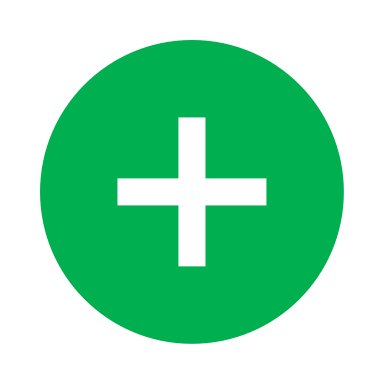

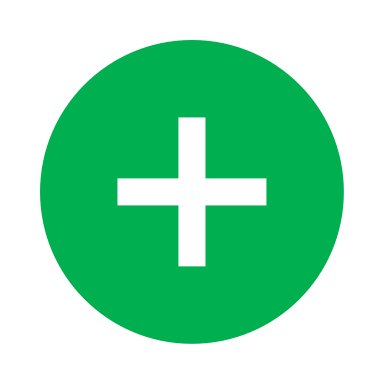

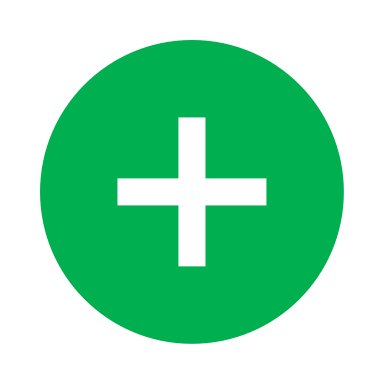

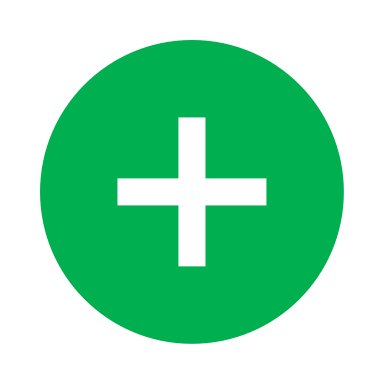

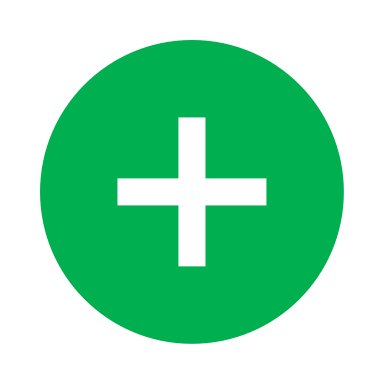

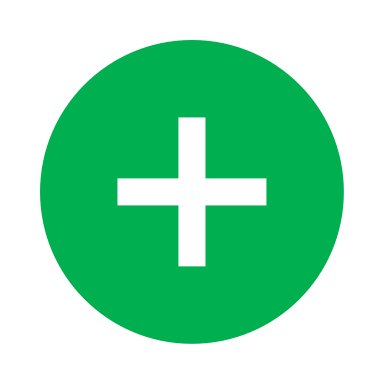

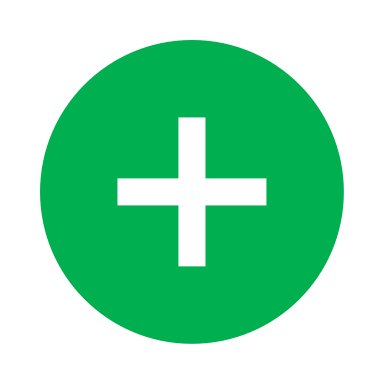

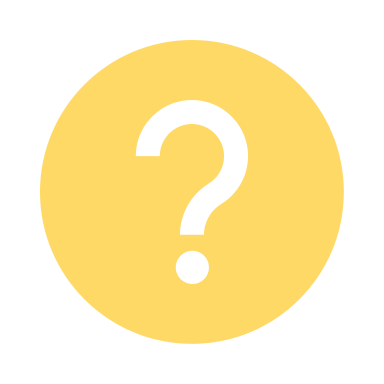

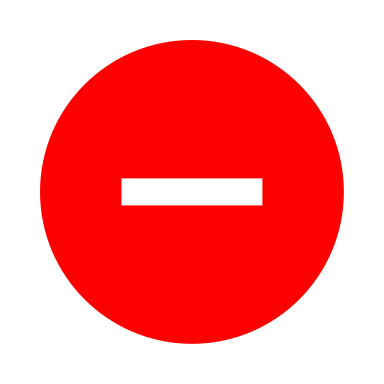

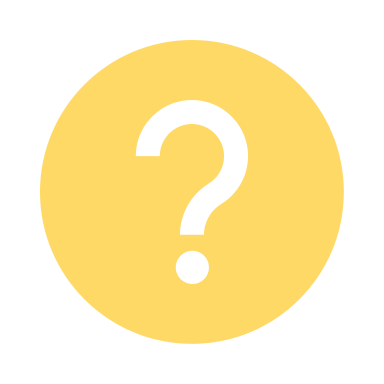

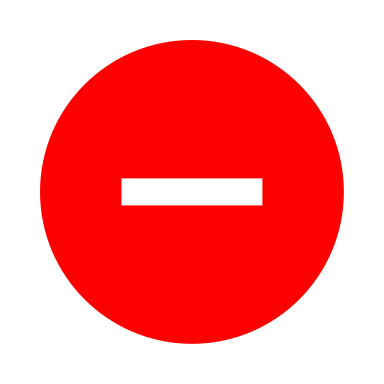

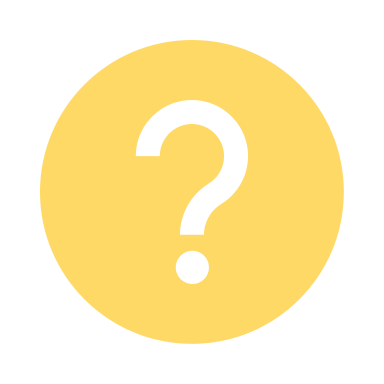

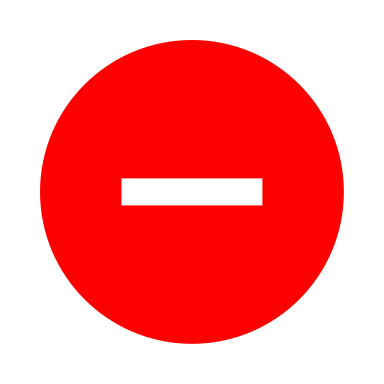

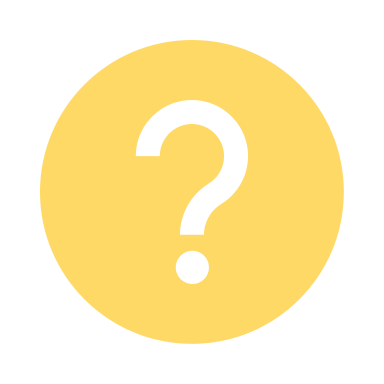

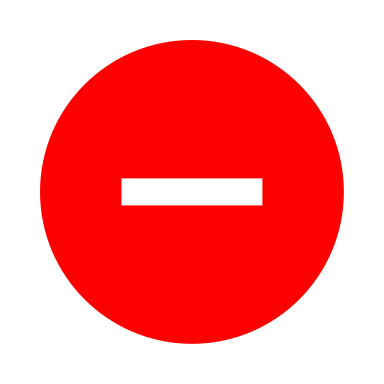

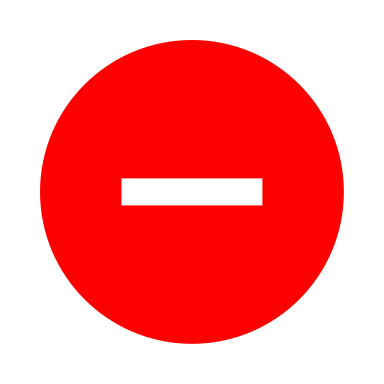

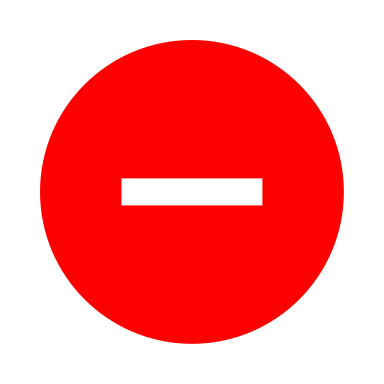

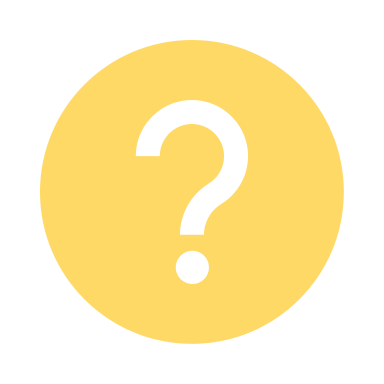

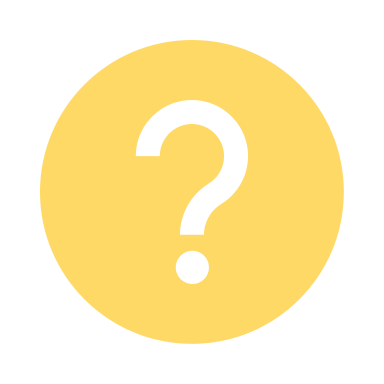

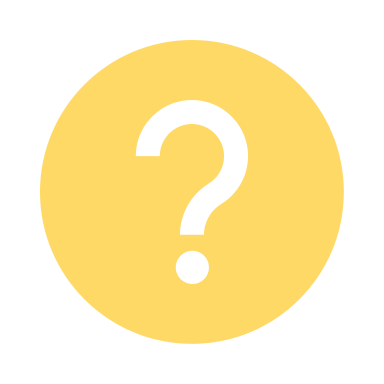

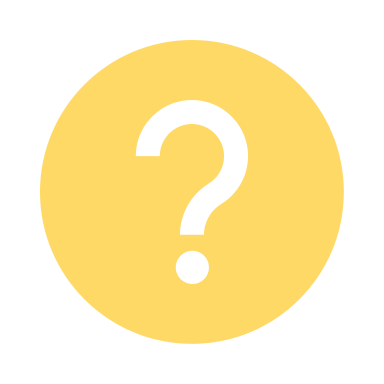

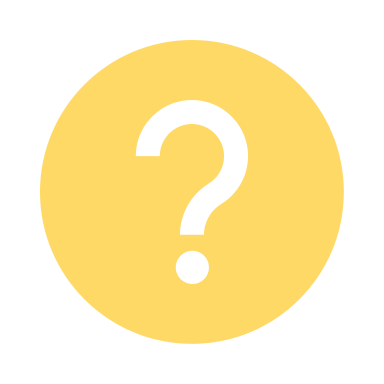

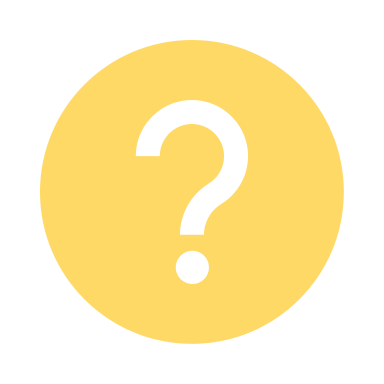

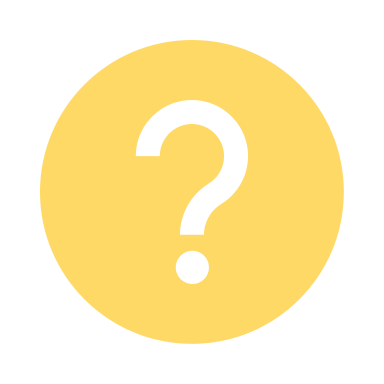

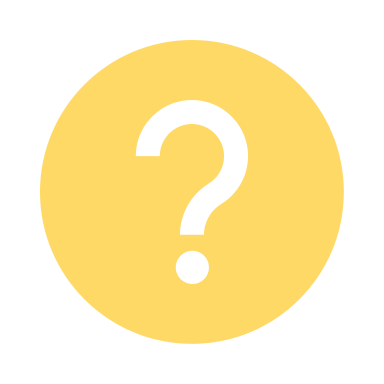

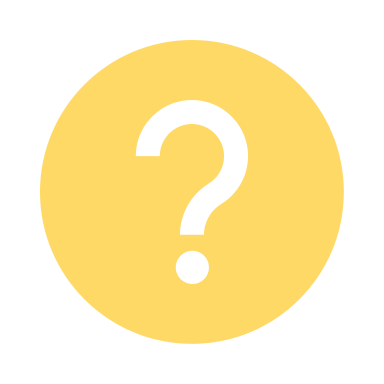

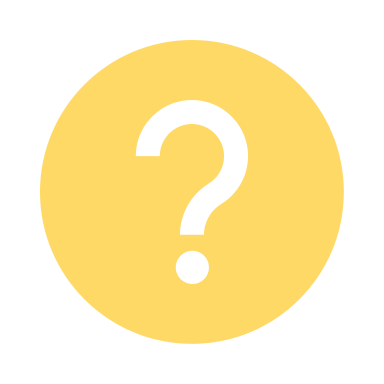

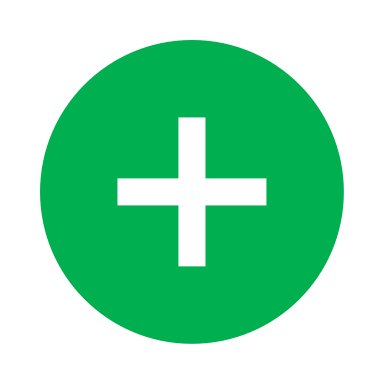

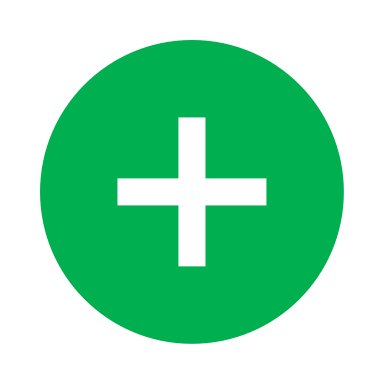

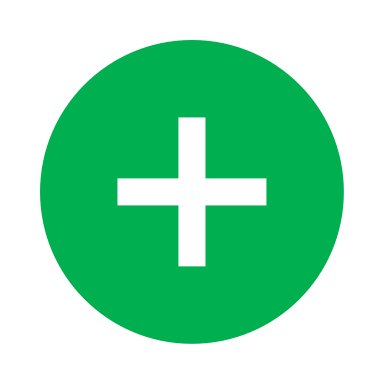

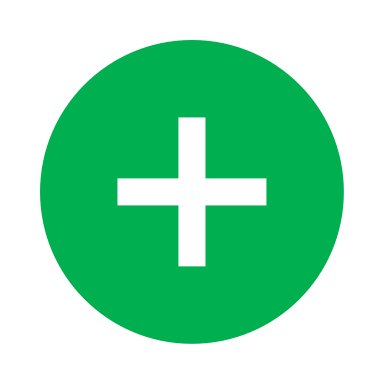

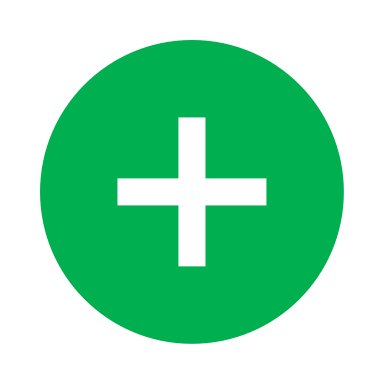

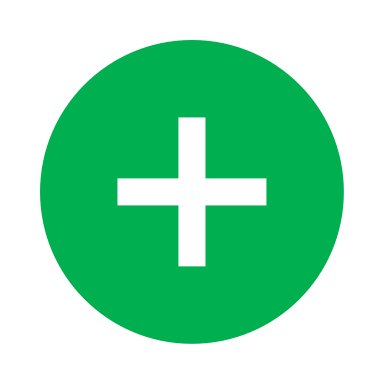

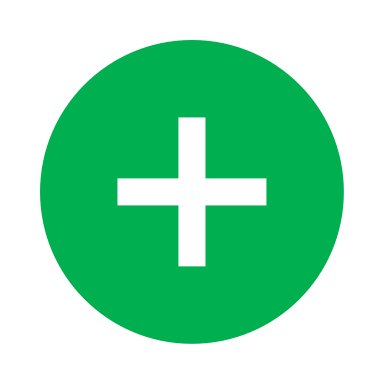

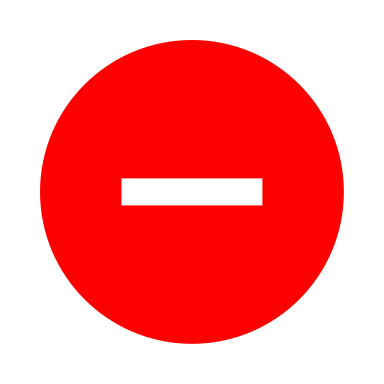

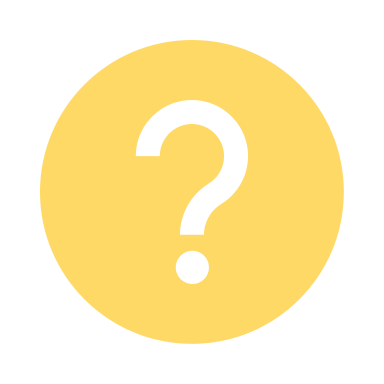

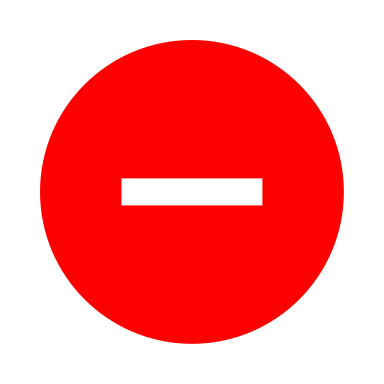

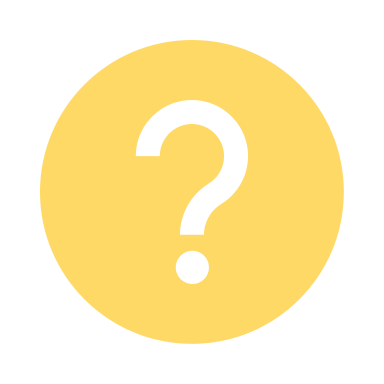

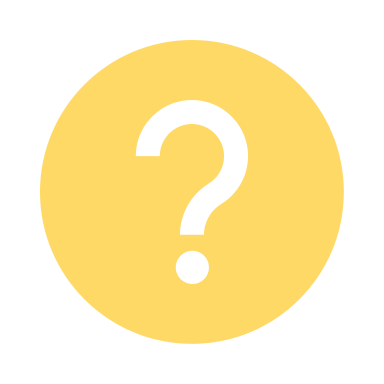

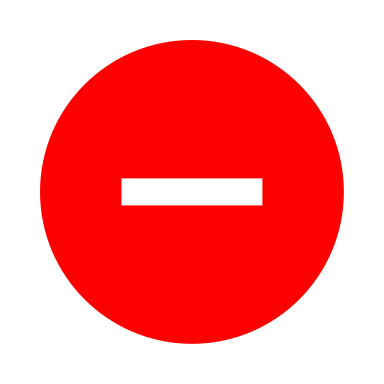


low risk, high risk, unclear risk

Supplement: Supplementary file 1 [file 28840038]
